# Supplementary material for: Detailed mechanism and kinetics of the reaction of Criegee intermediate CH2OO with HCOOH investigatedviainfrared identification of conformers of hydroperoxymethyl formate and formic acid anhydride
Source: Royal Society of Chemistry journal article supplement (doi:10.1039/c9cp04168k), 2019-01-01
Supplement: c9cp04168k1.pdf [file c9cp04168k1.pdf]

## Electronic Supplementary Material

### Detailed mechanism and kinetics of the reaction of Criegee intermediate CH<sub>2</sub>OO with HCOOH investigated via infrared identification of conformers of hydroperoxymethyl formate and formic acid anhydride

Chen-An Chung,<sup>1</sup> Jou Wei Su,<sup>1</sup> and Yuan-Pern Lee<sup>1, 2, 3\*</sup>

<sup>1</sup>*Department of Applied Chemistry and Institute of Molecular Science, National Chiao Tung University, 1001, Ta-Hsueh road, Hsinchu 30010, Taiwan*

<sup>2</sup>*Center for Emergent Functional Matter Science, National Chiao Tung University, Hsinchu 30010, Taiwan.*

<sup>3</sup>*Institute of Atomic and Molecular Science, Academia Sinica, Taipei 10617, Taiwan*

(Received June xx 2019; accepted xx xx 2019; published online xx xx 2019)

\*E-mail: [yplee@nctu.edu.tw](mailto:yplee@nctu.edu.tw)

## A. Computational results

Geometries of possible intermediates in reaction  $\text{CH}_2\text{OO} + \text{HCOOH}$  are shown in Fig. S3. Harmonic and anharmonic vibrational wavenumbers and harmonic IR intensities of conformers P1 and P2 of hydroxylated secondary ozonide (HSOZ) and conformers P4–P6 of hydroperoxymethyl formate (HPMF) predicted with the B3LYP/aug-cc-pVTZ method are listed in Tables S1 and S2, respectively. Those of *syn*- and *anti*-FAN (formic acid anhydride) predicted with the B3LYP/aug-cc-pVTZ method are listed in Table S3.

## B. Estimate of the ratio of $V_{\text{IR}}/V_{\text{photolysis}}$

Because photolysis volume  $V_{\text{photolysis}}$  is distinct from the IR-probe volume  $V_{\text{IR}}$ , we estimated the volume ratio to relate the IR absorption of  $\text{CH}_2\text{OO}$  with the true concentration of  $\text{CH}_2\text{OO}$  in the photolysis volume. The concentration  $c$  of each precursor can be estimated from its IR absorption according to the following equation:

$$c = \frac{\int A(\nu) d\nu \times \ln(10)}{S_{\text{band}} \times L} \quad (1)$$

in which  $A(\nu)$  is the absorbance (base 10),  $\int A(\nu) d\nu$  is the integrated intensity,  $S_{\text{band}}$  is the band intensity, and  $L$  is the IR absorption length, 367 cm.

To simulate properly the reaction kinetics of  $\text{CH}_2\text{OO} + \text{HCOOH}$ , we must know the initial concentration of  $\text{CH}_2\text{OO}$  or  $\text{CH}_2\text{I}$  in the reactor. Because the self-reaction of  $\text{CH}_2\text{OO}$  has been well characterized,<sup>1,2,3,4</sup> we found that we could estimate  $[\text{CH}_2\text{I}]_0$ , hence  $[\text{CH}_2\text{OO}]_0$ , on fitting the temporal profiles of  $[\text{CH}_2\text{OO}]$  (integrated over region 905–915  $\text{cm}^{-1}$ ) in the photolysis experiments of  $\text{CH}_2\text{I}_2$  and  $\text{O}_2$  using the reported kinetic model and rate coefficients discussed in Sec. C; the reaction  $\text{CH}_2\text{OO} + \text{HCOOH}$  was excluded from the model because no  $\text{HCOOH}$  was added in these experiments. Some representative temporal profiles of  $\text{CH}_2\text{OO}$  with their model fitted profiles (lines) are shown in Fig. S1; the satisfactory fits for the rise and decay of  $\text{CH}_2\text{OO}$  indicate that the model is adequate. From these fits, we derived  $[\text{CH}_2\text{I}]_0$

in the photolysis volume. We derived  $[\text{CH}_2\text{I}]_0$  in the IR-probe volume on probing the decrease in IR absorbance of  $\text{CH}_2\text{I}_2$  upon photolysis according to eq. (1). The band intensity  $S_{band}$  for  $\text{CH}_2\text{I}_2$  (in region  $1090\text{--}1135\text{ cm}^{-1}$ ) is  $13.08 \times 10^{-18}\text{ cm molecule}^{-1}$  (Ref. 5). We then derived ratio  $V_{\text{IR}}/V_{\text{photolysis}}$  according to  $[\text{CH}_2\text{I}]_0$  in the IR-probe volume and the photolysis volume. Several experiments at varied pressure were performed. The resultant ratios  $V_{\text{IR}}/V_{\text{photolysis}}$  are presented in Fig. S2; the average value is  $2.65 \pm 0.24$ .

### C. High-resolution spectra from $\text{CH}_2\text{I}_2/\text{HCOOH}/\text{N}_2/\text{O}_2$ (0.162/0.120/44.5/65.1, $P_{\text{T}} = 109.9$ Torr)

Observed spectra in region  $850\text{--}1450\text{ cm}^{-1}$  upon photolysis of a mixture of  $\text{CH}_2\text{I}_2/\text{HCOOH}/\text{N}_2/\text{O}_2$  (0.162/0.120/44.5/65.1,  $P_{\text{T}} = 109.9$  Torr) recorded with an external ADC at resolution  $0.5\text{ cm}^{-1}$  are presented in Fig. S4. Those in region  $1600\text{--}1900\text{ cm}^{-1}$  at resolution  $1\text{ cm}^{-1}$  are presented in Fig. S5.

### D. Simulation of bands of HPMF

With program PGopher,<sup>6</sup> we simulated the fundamental band of each vibrational mode of isomers P5 and P6 of HPMF using rotational parameters  $A''$ ,  $B''$ , and  $C''$ , ratios of rotational parameters  $A'/A''$ ,  $B'/B''$ , and  $C'/C''$  (Table S4) and  $a$ -type/ $b$ -type ratios (Table S5) of each mode predicted with the B3LYP/aug-cc-pVTZ-pp method,  $J_{\text{max}} = 200$ ,  $T = 298\text{ K}$ , and Gaussian width  $0.64\text{ cm}^{-1}$  (corresponding to the instrument resolution of  $0.5\text{ cm}^{-1}$ ).

Simulated  $a$ -,  $b$ -, and  $c$ -type spectra and the resultant spectra for bands  $A_4$  ( $\nu_{12}$ ) and  $A_5$  ( $\nu_{11}$ ) of HPMF (P5) are shown in Fig. S6. The squares of the projections of the dipole derivatives for each vibrational mode of HPMF onto rotational axes  $a$ ,  $b$  and  $c$  determine the weighting of bands of types  $a$ ,  $b$ , and  $c$  in each resultant vibrational absorption band. Because information was lacking, we assumed that the rotational contours and IR intensities of hot bands were the same as of the fundamental band. The contours of the hot bands were consequently derived from the fundamental band with intensities scaled according to a

Boltzmann distribution and positions shifted according to anharmonicity; the shifts depend on the difference in transition wavenumber between the fundamental band and the hot bands. We calculated, as initial estimates, the Boltzmann distributions of the excited states of the low-frequency modes according to the predicted anharmonic vibrational energies of the low-frequency modes ( $\nu_{24} = 79 \text{ cm}^{-1}$ ,  $\nu_{23} = 123 \text{ cm}^{-1}$ ,  $\nu_{22} = 214 \text{ cm}^{-1}$ ); the shifts among hot bands in a series were constant. A least-squares fit was performed on systematically varying the positions of the band origins (within  $\leq 5 \text{ cm}^{-1}$  of the predicted values) and intensities (within  $\pm 10\%$ ) for each band to obtain the best fit.

A comparison of the fitted contour with the experiment for bands  $A_4$  ( $\nu_{12}$ ) and  $A_5$  ( $\nu_{11}$ ) is presented in Fig. S7(a), in which the experimental data are presented with open circles and the simulated spectrum is shown as a thick red solid line. Each simulated feature consists of the fundamental band and hot bands in three series involving absorption from the excited states of the two torsional modes of least energy and one low-frequency bending mode; the dominant series of hot bands is associated with the torsion of OC–OC ( $\nu_{24}$ ), another with the torsion of OO–CO. ( $\nu_{23}$ ), and a third with the COC bending mode ( $\nu_{22}$ ). The components of hot bands in each individual series for bands  $A_5$  and  $A_4$  are shown in Figs. S7(b) and S7(c), respectively, with the same color for each series. Detailed positions and relative intensities of these components for bands  $A_5$  and  $A_4$  are listed in Tables S6 and S7, respectively. This simulation is not unique and is presented only to explain why the observed bands are much broader than those simulated without contributions of hot bands.

### **E. Kinetic model to fit the reaction $\text{CH}_2\text{OO} + \text{HCOOH}$**

$\text{CH}_2\text{OO}$  was produced from the reaction  $\text{CH}_2\text{I} + \text{O}_2$  upon irradiation at 248 nm with an excimer laser of a flowing mixture of  $\text{CH}_2\text{I}_2$  and  $\text{O}_2$  at 298 K. The initial concentration of  $\text{CH}_2\text{I}_2$  in the cell,  $[\text{CH}_2\text{I}_2]_0$ , was determined on comparison of the integrated absorbance in region 1090–1135  $\text{cm}^{-1}$  with the literature value of band strength, as described in Sec. A; it

also agrees with the values obtained on comparison with a calibration curve obtained on measurement of its IR absorption of CH<sub>2</sub>I<sub>2</sub> at varied pressure in a static cell. The initial concentration of CH<sub>2</sub>I in the IR-proved volume was estimated from  $-\Delta[\text{CH}_2\text{I}_2]$  upon irradiation. The initial concentration of CH<sub>2</sub>I in the photolysis volume,  $[\text{CH}_2\text{I}]_0$ , is estimated by  $-(V_{\text{IR}}/V_{\text{photolysis}})\times\Delta[\text{CH}_2\text{I}_2] = -2.65\times\Delta[\text{CH}_2\text{I}_2]$ ; the value of  $V_{\text{IR}}/V_{\text{photolysis}}$  was discussed in Sec. A. This value was compared with  $[\text{CH}_2\text{I}]_0 \times y$ , in which  $y$  is the fractional yield of photodissociation of CH<sub>2</sub>I<sub>2</sub>. The value of  $y$  was obtained from  $(F/h\nu_{308}) \times \sigma_{308}$ , in which  $F$  is the laser fluence and  $\sigma_{308}$  is the absorption cross section of CH<sub>2</sub>I<sub>2</sub> at 308 nm,  $3.2\times 10^{-18}$  cm<sup>2</sup> molecule<sup>-1</sup>.<sup>7</sup> Values of  $[\text{CH}_2\text{I}]_0$  derived from both methods are consistent, but we employed those derived from  $-\Delta[\text{CH}_2\text{I}_2]$  because they are derived spectroscopically. The concentration of HCOOH was determined from its integrated absorbance (in region 1050–1085 cm<sup>-1</sup>) and the associated band intensity  $5.83\times 10^{-18}$  cm molecule<sup>-1</sup>.<sup>8,9</sup>

To measure rate coefficient  $k$  of the reaction CH<sub>2</sub>OO + HCOOH, we employed a model slightly modified from that of our previous work,<sup>2</sup> as shown in Table S8. Following recent literature,<sup>10</sup> we separated the original channel (1c), CH<sub>2</sub>I + O<sub>2</sub> → other products, into two channels, (1c) and (1d), with products CH<sub>2</sub>O + IO and those from decomposition of CH<sub>2</sub>OO, respectively. Traces in Fig. S8 show representative experimental temporal profiles of HPMF and curves fitted from the model under various conditions. Traces in Fig. S9 show representative experimental temporal profiles of CH<sub>2</sub>OO and curves fitted from the model under various conditions. A summary of experimental conditions and the fitted results ( $k^{\text{I}}$ ) of 32 measurements are shown in Table S9. A plot of first-order rate coefficient vs [HCOOH] is shown in Fig. 8 in the main text. The fitted bimolecular rate coefficient of each set of experiments is summarized in Table S10; the rate coefficient derived from fitting all data is  $k_1 = (1.44\pm 0.04)\times 10^{-10}$  cm<sup>3</sup> molecule<sup>-1</sup> s<sup>-1</sup>; the listed error represents one standard deviation in

the fit.

Considering the errors in the estimation of  $[\text{CH}_2\text{I}]_0$  (~20 %), fitting error (12.8 %), error resulted from the uncertainties in rate coefficient of the self-reaction of  $\text{CH}_2\text{OO}$  ( $k_{\text{self}}$  in Table S8, the error of 25% transforms into an error of 1 % in  $k_1$ ) and other standard errors in measurements of flow rates (1 %), temperature (1 %), and pressure (3 %), we estimated the overall uncertainty to be 24 %. A rate coefficient for the reaction of  $\text{CH}_2\text{OO} + \text{HCOOH}$  at 298 K is hence reported to be  $k_1 = (1.4 \pm 0.3) \times 10^{-10} \text{ cm}^3 \text{ molecule}^{-1} \text{ s}^{-1}$ .

#### **F. Detailed mechanism of HPMF $\rightarrow$ FAN**

To prove that the revised two-channel model discussed in the main text, Sec. 4.4 is valid, we compared temporal profiles of HPMF on integrating regions 1330–1370  $\text{cm}^{-1}$  (which corresponds to a mixture of isomers P5 and P6 of HPMF) and 1157–1186  $\text{cm}^{-1}$  (which corresponds to mostly P6 of HPMF), respectively, as shown in Fig. S10.

**Table S1** Harmonic and anharmonic vibrational wavenumbers ( $\text{cm}^{-1}$ ) and harmonic IR intensities ( $\text{km mol}^{-1}$ ) of conformers P1 and P2 of hydroxylated secondary ozonide (HSOZ) predicted with the B3LYP/aug-cc-pVTZ method

| Mode            | P1         |            | P2         |            |
|-----------------|------------|------------|------------|------------|
|                 | Harmonic   | Anharmonic | Harmonic   | Anharmonic |
| v <sub>1</sub>  | 3778 (47)  | 3582       | 3801 (54)  | 3612       |
| v <sub>2</sub>  | 3114 (3)   | 2970       | 3112 (10)  | 2961       |
| v <sub>3</sub>  | 3111 (21)  | 2967       | 3044 (32)  | 2914       |
| v <sub>4</sub>  | 3017 (64)  | 2794       | 3013 (70)  | 2806       |
| v <sub>5</sub>  | 1520 (1)   | 1425       | 1521 (0)   | 1437       |
| v <sub>6</sub>  | 1433 (71)  | 1391       | 1422 (267) | 1385       |
| v <sub>7</sub>  | 1399 (10)  | 1369       | 1394 (11)  | 1361       |
| v <sub>8</sub>  | 1309 (4)   | 1273       | 1328 (35)  | 1300       |
| v <sub>9</sub>  | 1286 (12)  | 1251       | 1247 (39)  | 1217       |
| v <sub>10</sub> | 1230 (3)   | 1199       | 1225 (3)   | 1194       |
| v <sub>11</sub> | 1156 (29)  | 1135       | 1148 (14)  | 1128       |
| v <sub>12</sub> | 1127 (391) | 1095       | 1110 (451) | 1077       |
| v <sub>13</sub> | 1075 (103) | 1043       | 1079 (66)  | 1053       |
| v <sub>14</sub> | 1003 (92)  | 969        | 1026 (55)  | 998        |
| v <sub>15</sub> | 949 (72)   | 925        | 966 (62)   | 945        |
| v <sub>16</sub> | 889 (9)    | 861        | 914 (9)    | 890        |
| v <sub>17</sub> | 867 (18)   | 848        | 870 (15)   | 852        |
| v <sub>18</sub> | 790 (25)   | 775        | 815 (4)    | 799        |
| v <sub>19</sub> | 732 (2)    | 719        | 730 (4)    | 717        |
| v <sub>20</sub> | 555 (17)   | 542        | 566 (13)   | 555        |
| v <sub>21</sub> | 508 (19)   | 469        | 486 (7)    | 477        |
| v <sub>22</sub> | 337 (20)   | 280        | 304 (37)   | 213        |
| v <sub>23</sub> | 294 (68)   | 163        | 284 (86)   | 117        |
| v <sub>24</sub> | 130 (3)    | 134        | 128 (13)   | 124        |

**Table S2** Harmonic and anharmonic vibrational wavenumbers ( $\text{cm}^{-1}$ ) and harmonic IR intensities ( $\text{km mol}^{-1}$ ) of conformers P4–P6 of hydroperoxymethyl formate (HPMF) predicted with the B3LYP/aug-cc-pVTZ method

| Mode            | P4         |            | P5         |            | P6         |            |
|-----------------|------------|------------|------------|------------|------------|------------|
|                 | Harmonic   | Anharmonic | Harmonic   | Anharmonic | Harmonic   | Anharmonic |
| v <sub>1</sub>  | 3748 (56)  | 3564       | 3740 (43)  | 3538       | 3511 (260) | 3304       |
| v <sub>2</sub>  | 3126 (6)   | 2985       | 3131 (6)   | 2983       | 3148 (3)   | 2998       |
| v <sub>3</sub>  | 3038 (33)  | 2885       | 3067 (9)   | 2978       | 3076 (16)  | 2973       |
| v <sub>4</sub>  | 2984 (38)  | 2853       | 3038 (48)  | 2889       | 3057 (42)  | 2902       |
| v <sub>5</sub>  | 1838 (395) | 1801       | 1784 (323) | 1751       | 1760 (281) | 1727       |
| v <sub>6</sub>  | 1485 (4)   | 1464       | 1479 (7)   | 1458       | 1497 (88)  | 1435       |
| v <sub>7</sub>  | 1425 (11)  | 1394       | 1410 (33)  | 1385       | 1470 (6)   | 1444       |
| v <sub>8</sub>  | 1401 (15)  | 1370       | 1398 (4)   | 1364       | 1419 (5)   | 1385       |
| v <sub>9</sub>  | 1384 (38)  | 1352       | 1381 (41)  | 1346       | 1403 (4)   | 1369       |
| v <sub>10</sub> | 1314 (19)  | 1279       | 1284 (1)   | 1256       | 1306 (10)  | 1275       |
| v <sub>11</sub> | 1183 (176) | 1155       | 1196 (301) | 1157       | 1197 (269) | 1147       |
| v <sub>12</sub> | 1091 (115) | 1058       | 1138 (123) | 1115       | 1150 (16)  | 1128       |
| v <sub>13</sub> | 1037 (63)  | 1014       | 1090 (79)  | 1060       | 1076 (102) | 1044       |
| v <sub>14</sub> | 1031 (111) | 1002       | 1040 (0)   | 1020       | 1049 (6)   | 1026       |
| v <sub>15</sub> | 1019 (141) | 992        | 929 (109)  | 901        | 899 (7)    | 876        |
| v <sub>16</sub> | 882 (31)   | 861        | 885 (38)   | 860        | 829 (130)  | 799        |
| v <sub>17</sub> | 693 (23)   | 681        | 780 (1)    | 768        | 781 (12)   | 768        |
| v <sub>18</sub> | 533 (6)    | 523        | 545 (2)    | 537        | 606 (115)  | 510        |
| v <sub>19</sub> | 424 (5)    | 416        | 407 (28)   | 395        | 542 (6)    | 535        |
| v <sub>20</sub> | 337 (9)    | 325        | 320 (50)   | 250        | 438 (6)    | 428        |
| v <sub>21</sub> | 272 (93)   | 189        | 270 (97)   | 255        | 302 (19)   | 291        |
| v <sub>22</sub> | 186 (25)   | 162        | 222 (4)    | 214        | 245 (8)    | 218        |
| v <sub>23</sub> | 141 (36)   | 136        | 140 (5)    | 123        | 205 (9)    | 198        |
| v <sub>24</sub> | 79 (1)     | 79         | 29 (2)     | 79         | 104 (2)    | 95         |



**Table S3** Harmonic and anharmonic vibrational wavenumbers ( $\text{cm}^{-1}$ ) and harmonic IR intensities ( $\text{km mol}^{-1}$ ) of *syn*- and *anti*-FAN (formic acid anhydride) predicted with the B3LYP/aug-cc-pVTZ method

| Mode       | <i>syn</i> -FAN |            | <i>anti</i> -FAN |            |
|------------|-----------------|------------|------------------|------------|
|            | Harmonic        | Anharmonic | Harmonic         | Anharmonic |
| $\nu_1$    | 3049 (35)       | 2897       | 3089 (9)         | 2939       |
| $\nu_2$    | 3047 (46)       | 2897       | 3058 (32)        | 2902       |
| $\nu_3$    | 1882 (322)      | 1844       | 1860 (157)       | 1832       |
| $\nu_4$    | 1795 (188)      | 1763       | 1809 (443)       | 1781       |
| $\nu_5$    | 1409 (2)        | 1375       | 1406 (4)         | 1374       |
| $\nu_6$    | 1393 (2)        | 1359       | 1381 (2)         | 1353       |
| $\nu_7$    | 1081 (696)      | 1041       | 1104 (609)       | 1065       |
| $\nu_8$    | 1045 (0)        | 1024       | 1046 (0)         | 1025       |
| $\nu_9$    | 1007 (111)      | 993        | 1034 (0)         | 1018       |
| $\nu_{10}$ | 972 (4)         | 952        | 1005 (242)       | 971        |
| $\nu_{11}$ | 797 (34)        | 781        | 781 (6)          | 766        |
| $\nu_{12}$ | 561 (14)        | 555        | 538 (6)          | 532        |
| $\nu_{13}$ | 216 (26)        | 203        | 252 (10)         | 248        |
| $\nu_{14}$ | 211 (1)         | 208        | 224 (11)         | 217        |
| $\nu_{15}$ | 103 (2)         | 83         | 75 (39)          | 89         |

**Table S4** Rotational parameters of the ground state and vibrationally excited states ( $v = 1$ ) of conformers P5 and P6 of HPMF predicted with the B3LYP/aug-cc-pVTZ method

| Mode            | HPMF (P5)              |                        |                        | HPMF (P6)              |                        |                        |
|-----------------|------------------------|------------------------|------------------------|------------------------|------------------------|------------------------|
|                 | $A'/A''$               | $B'/B''$               | $C'/C''$               | $A'/A''$               | $B'/B''$               | $C'/C''$               |
| v <sub>1</sub>  | 1.002                  | 1.000                  | 0.999                  | 0.999                  | 0.999                  | 1.000                  |
| v <sub>2</sub>  | 0.999                  | 1.000                  | 1.000                  | 1.002                  | 0.998                  | 0.999                  |
| v <sub>3</sub>  | 1.001                  | 1.000                  | 0.999                  | 1.004                  | 0.990                  | 0.995                  |
| v <sub>4</sub>  | 0.996                  | 1.000                  | 1.000                  | 1.000                  | 0.999                  | 1.000                  |
| v <sub>5</sub>  | 0.998                  | 1.000                  | 0.999                  | 0.999                  | 0.999                  | 0.999                  |
| v <sub>6</sub>  | 1.000                  | 1.000                  | 1.001                  | 1.000                  | 1.000                  | 0.999                  |
| v <sub>7</sub>  | 1.002                  | 0.999                  | 0.997                  | 1.004                  | 0.987                  | 0.994                  |
| v <sub>8</sub>  | 1.000                  | 1.001                  | 1.000                  | 0.999                  | 0.999                  | 0.998                  |
| v <sub>9</sub>  | 0.998                  | 0.999                  | 0.999                  | 0.998                  | 0.998                  | 0.997                  |
| v <sub>10</sub> | 0.996                  | 1.000                  | 1.001                  | 0.998                  | 0.999                  | 0.999                  |
| v <sub>11</sub> | 0.987                  | 0.999                  | 1.001                  | 0.998                  | 0.999                  | 1.000                  |
| v <sub>12</sub> | 1.020                  | 0.997                  | 0.992                  | 0.997                  | 0.997                  | 0.998                  |
| v <sub>13</sub> | 0.982                  | 0.999                  | 1.003                  | 1.001                  | 0.999                  | 0.999                  |
| v <sub>14</sub> | 0.999                  | 0.999                  | 0.999                  | 0.998                  | 0.998                  | 0.998                  |
| v <sub>15</sub> | 1.002                  | 0.997                  | 1.003                  | 0.999                  | 1.000                  | 1.000                  |
| v <sub>16</sub> | 0.997                  | 0.998                  | 0.998                  | 1.002                  | 0.999                  | 1.000                  |
| v <sub>17</sub> | 1.006                  | 0.998                  | 0.996                  | 0.999                  | 0.997                  | 0.999                  |
| v <sub>18</sub> | 1.003                  | 0.997                  | 0.998                  | 1.000                  | 1.003                  | 1.001                  |
| v <sub>19</sub> | 0.968                  | 1.003                  | 1.010                  | 1.001                  | 0.996                  | 0.998                  |
| v <sub>20</sub> | 1.022                  | 0.996                  | 0.992                  | 0.998                  | 1.001                  | 0.999                  |
| v <sub>21</sub> | 1.001                  | 0.999                  | 1.000                  | 1.000                  | 0.999                  | 0.999                  |
| v <sub>22</sub> | 1.005                  | 0.998                  | 0.998                  | 0.999                  | 1.000                  | 1.000                  |
| v <sub>23</sub> | 1.007                  | 0.999                  | 0.999                  | 0.999                  | 1.001                  | 1.000                  |
| v <sub>24</sub> | 0.991                  | 1.000                  | 1.005                  | 0.995                  | 1.011                  | 1.004                  |
| $v = 0$         | $A'' / \text{cm}^{-1}$ | $B'' / \text{cm}^{-1}$ | $C'' / \text{cm}^{-1}$ | $A'' / \text{cm}^{-1}$ | $B'' / \text{cm}^{-1}$ | $C'' / \text{cm}^{-1}$ |
|                 | 0.4025                 | 0.0603                 | 0.0571                 | 0.1949                 | 0.1099                 | 0.0750                 |

**Table S5** Ratios of *a*-, *b*-, and *c*-types of vibrational bands for each vibrational mode of conformers P5 and P6 of HPMF predicted with the B3LYP/aug-cc-pVTZ method

| Mode            | HPMF (P5)      |                |                | HPMF (P6)      |                |                |
|-----------------|----------------|----------------|----------------|----------------|----------------|----------------|
|                 | <i>a</i> -type | <i>b</i> -type | <i>c</i> -type | <i>a</i> -type | <i>b</i> -type | <i>c</i> -type |
| v <sub>1</sub>  | 0.11           | 0.80           | 0.09           | 0.91           | 0.09           | 0.00           |
| v <sub>2</sub>  | 0.10           | 0.00           | 0.90           | 0.10           | 0.56           | 0.34           |
| v <sub>3</sub>  | 0.01           | 0.79           | 0.20           | 0.01           | 0.51           | 0.48           |
| v <sub>4</sub>  | 0.14           | 0.78           | 0.08           | 0.91           | 0.03           | 0.06           |
| v <sub>5</sub>  | 0.65           | 0.25           | 0.10           | 0.01           | 0.99           | 0.00           |
| v <sub>6</sub>  | 0.48           | 0.31           | 0.21           | 0.34           | 0.60           | 0.06           |
| v <sub>7</sub>  | 0.83           | 0.15           | 0.02           | 0.26           | 0.04           | 0.70           |
| v <sub>8</sub>  | 0.48           | 0.52           | 0.00           | 0.46           | 0.31           | 0.23           |
| v <sub>9</sub>  | 0.32           | 0.40           | 0.28           | 0.01           | 0.98           | 0.01           |
| v <sub>10</sub> | 0.03           | 0.00           | 0.97           | 0.27           | 0.70           | 0.03           |
| v <sub>11</sub> | 0.97           | 0.03           | 0.00           | 0.51           | 0.47           | 0.02           |
| v <sub>12</sub> | 0.87           | 0.04           | 0.09           | 0.56           | 0.01           | 0.43           |
| v <sub>13</sub> | 0.97           | 0.00           | 0.03           | 0.95           | 0.00           | 0.05           |
| v <sub>14</sub> | 0.89           | 0.11           | 0.00           | 0.93           | 0.05           | 0.02           |
| v <sub>15</sub> | 0.46           | 0.49           | 0.05           | 0.11           | 0.46           | 0.43           |
| v <sub>16</sub> | 0.98           | 0.02           | 0.00           | 0.98           | 0.00           | 0.02           |
| v <sub>17</sub> | 0.96           | 0.04           | 0.00           | 0.75           | 0.12           | 0.13           |
| v <sub>18</sub> | 0.93           | 0.01           | 0.06           | 0.15           | 0.18           | 0.67           |
| v <sub>19</sub> | 0.49           | 0.02           | 0.49           | 0.43           | 0.08           | 0.49           |
| v <sub>20</sub> | 0.37           | 0.08           | 0.55           | 0.05           | 0.12           | 0.83           |
| v <sub>21</sub> | 0.88           | 0.01           | 0.11           | 0.56           | 0.13           | 0.31           |
| v <sub>22</sub> | 0.46           | 0.30           | 0.24           | 0.79           | 0.19           | 0.02           |
| v <sub>23</sub> | 0.92           | 0.06           | 0.02           | 0.13           | 0.87           | 0.00           |
| v <sub>24</sub> | 0.01           | 0.13           | 0.86           | 0.46           | 0.49           | 0.05           |

**Table S6** Relative population of the lower state and band origins of hot bands employed in the simulation of the  $\nu_{11}$  band of HPMF (P5)

| Transition      | Relative population | Band origins / $\text{cm}^{-1}$ |
|-----------------|---------------------|---------------------------------|
| $11_0^1$        | 1.00                | 1169.5                          |
| $11_0^1 24_1^1$ | 0.85                | 1176.5                          |
| $11_0^1 24_2^2$ | 0.58                | 1185.5                          |
| $11_0^1 24_3^3$ | 0.40                | 1191.5                          |
| $11_0^1 24_4^4$ | 0.13                | 1201.8                          |
| $11_0^1 24_5^5$ | 0.05                | 1210.0                          |
| $11_0^1 24_6^6$ | 0.02                | 1218.0                          |
| $11_0^1 23_1^1$ | 0.67                | 1163.5                          |
| $11_0^1 23_2^2$ | 0.35                | 1153.5                          |
| $11_0^1 23_3^3$ | 0.21                | 1145.5                          |
| $11_0^1 23_4^4$ | 0.11                | 1141.0                          |
| $11_0^1 23_5^5$ | 0.06                | 1134.0                          |
| $11_0^1 22_1^1$ | 0.42                | 1159.0                          |
| $11_0^1 22_2^2$ | 0.18                | 1141.0                          |
| $11_0^1 22_3^3$ | 0.05                | 1122.0                          |

**Table S7** Relative population of the lower state and band origins of hot bands employed in the simulation of the  $\nu_{12}$  band of HPMF (P5)

| Transition      | Relative population | Band origins / $\text{cm}^{-1}$ |
|-----------------|---------------------|---------------------------------|
| $12_0^1$        | 1.00                | 1115.0                          |
| $12_0^1 24_1^1$ | 0.72                | 1110.5                          |
| $12_0^1 24_2^2$ | 0.45                | 1107.0                          |
| $12_0^1 24_3^3$ | 0.22                | 1103.0                          |
| $12_0^1 24_4^4$ | 0.10                | 1099.0                          |
| $12_0^1 24_5^5$ | 0.04                | 1095.0                          |
| $12_0^1 24_6^6$ | 0.01                | 1091.0                          |
| $12_0^1 23_1^1$ | 0.58                | 1121.0                          |
| $12_0^1 23_2^2$ | 0.32                | 1128.0                          |
| $12_0^1 23_3^3$ | 0.18                | 1133.0                          |
| $12_0^1 23_4^4$ | 0.10                | 1139.0                          |
| $12_0^1 23_5^5$ | 0.06                | 1145.0                          |
| $12_0^1 22_1^1$ | 0.37                | 1135.0                          |
| $12_0^1 22_2^2$ | 0.05                | 1155.0                          |

**Table S8** Kinetic model employed in fitting the temporal profiles of CH<sub>2</sub>OO + HCOOH

|                   | reaction                                                                                      | rate coefficient <sup>a</sup>                                | condition   | reference |
|-------------------|-----------------------------------------------------------------------------------------------|--------------------------------------------------------------|-------------|-----------|
| $k_{1a}^b$        | CH <sub>2</sub> I + O <sub>2</sub> → CH <sub>2</sub> OO + I                                   | $1.5 \times 10^{-12} / (1 + 1.1 \times 10^{-19} [\text{M}])$ | P ≥ 60 Torr | 2         |
| $\beta$           | Fraction of survival of CH <sub>2</sub> OO<br>when P < 60 Torr,<br>$\beta = k_{1a}' / k_{1a}$ | $\{1 - 0.47 / (1 + 3.2 \times 10^{-18} [\text{M}])\}$        | P < 60 Torr | 2         |
| $k_{1b}^b$        | CH <sub>2</sub> I + O <sub>2</sub> → ICH <sub>2</sub> OO                                      | $1.5 \times 10^{-12} - k_{1a}$                               | P ≥ 60 Torr | 2         |
| $k_{1c}^b$        | CH <sub>2</sub> I + O <sub>2</sub> → other + I                                                | $k_{1a}(1 - \beta) - k_{1d}$                                 | P < 60 Torr | 2         |
| $k_{1d}^b$        | CH <sub>2</sub> I + O <sub>2</sub> → H <sub>2</sub> CO + IO                                   | $4.0 \times 10^{-13}$                                        | P < 60 Torr | 10        |
| $k_{2a}$          | CH <sub>2</sub> OO + I → CH <sub>2</sub> I + O <sub>2</sub>                                   | $55k_{1a}$                                                   |             | 2         |
| $k_{2b}$          | CH <sub>2</sub> OO + I → ICH <sub>2</sub> OO                                                  | $55k_{1b}$                                                   |             | 2         |
| $k_{2c}$          | CH <sub>2</sub> OO + I → H <sub>2</sub> CO + IO                                               | $9.0 \times 10^{-12}$                                        |             | 2         |
| $k_3$             | CH <sub>2</sub> OO + CH <sub>2</sub> I → C <sub>2</sub> H <sub>4</sub> I + O <sub>2</sub>     | $6.3 \times 10^{-11}$                                        |             | 11        |
| $k_{\text{self}}$ | 2CH <sub>2</sub> OO → 2H <sub>2</sub> CO + O <sub>2</sub>                                     | $8.0 \times 10^{-11}$                                        |             | 1–4       |
| $k_4$             | ICH <sub>2</sub> OO + I → ICH <sub>2</sub> O + IO                                             | $3.5 \times 10^{-11}$                                        |             | 12        |
| $k_5$             | 2ICH <sub>2</sub> OO → 2ICH <sub>2</sub> O + O <sub>2</sub>                                   | $9.0 \times 10^{-11}$                                        |             | 12        |
| $k_6$             | ICH <sub>2</sub> O → H <sub>2</sub> CO + I                                                    | $10^6 \text{ s}^{-1}$                                        |             | 12        |
| $k_7$             | 2IO → I <sub>2</sub> + O <sub>2</sub>                                                         | $9.9 \times 10^{-11}$                                        |             | 13        |
| $k_8$             | CH <sub>2</sub> OO + HCOOH → product                                                          | $k^I = k_8 [\text{HCOOH}]_0$ , fitted                        |             |           |

<sup>a</sup> rate coefficient in cm<sup>3</sup> molecule<sup>-1</sup> s<sup>-1</sup>, unless specified otherwise, [M] in molecule cm<sup>-3</sup>. <sup>b</sup>  $k_{1a} + k_{1b} + k_{1c} + k_{1d} = 1.5 \times 10^{-12} \text{ cm}^3 \text{ molecule}^{-1} \text{ s}^{-1}$ .

**Table S9** First-order rate coefficients of reaction  $\text{CH}_2\text{OO} + \text{HCOOH}$  in varied sets of experiments

| Set | Expt. | region<br>/cm <sup>-1</sup> | [CH <sub>2</sub> I <sub>2</sub> ] <sub>0</sub><br>/mTorr | [CH <sub>2</sub> I] <sub>0</sub><br>/10 <sup>14</sup> <sup>a</sup> | [CH <sub>2</sub> OO] <sub>0</sub><br>/10 <sup>14</sup> <sup>a</sup> | [O <sub>2</sub> ] <sub>0</sub><br>/Torr | [N <sub>2</sub> ] <sub>0</sub><br>/Torr | [HCOOH]<br>/10 <sup>15</sup> <sup>a</sup> | k <sup>†</sup><br>/10 <sup>5</sup> s <sup>-1</sup> |
|-----|-------|-----------------------------|----------------------------------------------------------|--------------------------------------------------------------------|---------------------------------------------------------------------|-----------------------------------------|-----------------------------------------|-------------------------------------------|----------------------------------------------------|
| 1   | 1     | 1157–1186                   | 45                                                       | 2.4                                                                | 1.5                                                                 | 53                                      | 47                                      | 1.4                                       | 2.2                                                |
|     | 2     | 1157–1186                   | 45                                                       | 2.4                                                                | 1.5                                                                 | 53                                      | 47                                      | 1.7                                       | 2.6                                                |
|     | 3     | 1157–1186                   | 45                                                       | 2.4                                                                | 1.5                                                                 | 53                                      | 47                                      | 1.9                                       | 2.9                                                |
|     | 4     | 1157–1186                   | 45                                                       | 2.4                                                                | 1.5                                                                 | 53                                      | 47                                      | 2.2                                       | 3.6                                                |
|     | 5     | 1157–1186                   | 45                                                       | 2.4                                                                | 1.5                                                                 | 53                                      | 47                                      | 2.5                                       | 3.8                                                |
|     | 6     | 1157–1186                   | 45                                                       | 2.4                                                                | 1.5                                                                 | 53                                      | 47                                      | 3.0                                       | 4.3                                                |
|     | 7     | 1157–1186                   | 45                                                       | 2.4                                                                | 1.5                                                                 | 53                                      | 47                                      | 3.0                                       | 4.4                                                |
| 2   | 8     | 1157–1186                   | 37                                                       | 1.4                                                                | 0.87                                                                | 53                                      | 47                                      | 1.7                                       | 2.9                                                |
|     | 9     | 1157–1186                   | 37                                                       | 1.4                                                                | 0.87                                                                | 53                                      | 47                                      | 2.0                                       | 3.2                                                |
|     | 10    | 1157–1186                   | 37                                                       | 1.4                                                                | 0.87                                                                | 53                                      | 47                                      | 2.3                                       | 3.8                                                |
|     | 11    | 1157–1186                   | 37                                                       | 1.4                                                                | 0.87                                                                | 53                                      | 47                                      | 2.5                                       | 4.2                                                |
|     | 12    | 1157–1186                   | 37                                                       | 1.4                                                                | 0.87                                                                | 53                                      | 47                                      | 2.7                                       | 4.4                                                |
| 3   | 13    | 1157–1186                   | 30                                                       | 1.1                                                                | 0.67                                                                | 53                                      | 47                                      | 1.7                                       | 2.5                                                |
|     | 14    | 1157–1186                   | 30                                                       | 1.1                                                                | 0.67                                                                | 53                                      | 47                                      | 2.0                                       | 3.0                                                |
|     | 15    | 1157–1186                   | 30                                                       | 1.1                                                                | 0.67                                                                | 53                                      | 47                                      | 2.4                                       | 3.2                                                |
|     | 16    | 1157–1186                   | 30                                                       | 1.1                                                                | 0.67                                                                | 53                                      | 47                                      | 2.6                                       | 3.8                                                |
|     | 17    | 1157–1186                   | 30                                                       | 1.1                                                                | 0.67                                                                | 53                                      | 47                                      | 3.1                                       | 4.3                                                |
| 4   | 18    | 1157–1186                   | 45                                                       | 2.4                                                                | 1.3                                                                 | 120                                     | 90                                      | 2.1                                       | 3.0                                                |
|     | 19    | 1157–1186                   | 45                                                       | 2.4                                                                | 1.3                                                                 | 120                                     | 90                                      | 2.3                                       | 3.3                                                |
|     | 20    | 1157–1186                   | 45                                                       | 2.4                                                                | 1.3                                                                 | 120                                     | 90                                      | 2.5                                       | 3.6                                                |
|     | 21    | 1157–1186                   | 45                                                       | 2.4                                                                | 1.3                                                                 | 120                                     | 90                                      | 2.7                                       | 3.8                                                |
|     | 22    | 1157–1186                   | 45                                                       | 2.4                                                                | 1.3                                                                 | 120                                     | 90                                      | 2.8                                       | 3.8                                                |
|     | 23    | 1157–1186                   | 45                                                       | 2.4                                                                | 1.3                                                                 | 120                                     | 90                                      | 2.9                                       | 4.0                                                |
|     | 24    | 1157–1186                   | 45                                                       | 2.4                                                                | 1.3                                                                 | 120                                     | 90                                      | 3.1                                       | 4.3                                                |
| 5   | 25    | 1157–1186                   | 18                                                       | 1.3                                                                | 1.0                                                                 | 20                                      | 0                                       | 0.58                                      | 0.65                                               |
|     | 26    | 1157–1186                   | 18                                                       | 1.3                                                                | 1.0                                                                 | 20                                      | 0                                       | 1.0                                       | 1.1                                                |
|     | 27    | 1157–1186                   | 18                                                       | 1.3                                                                | 1.0                                                                 | 20                                      | 0                                       | 2.1                                       | 2.6                                                |
|     | 28    | 1157–1186                   | 18                                                       | 1.3                                                                | 1.0                                                                 | 20                                      | 0                                       | 2.5                                       | 3.1                                                |
| 6   | 29    | 1000–1050                   | 42                                                       | 2.9                                                                | 2.1                                                                 | 40                                      | 0                                       | 1.5                                       | 1.9                                                |
|     | 30    | 1000–1050                   | 42                                                       | 2.9                                                                | 2.1                                                                 | 40                                      | 0                                       | 2.9                                       | 4.3                                                |
|     | 31    | 1000–1050                   | 42                                                       | 2.9                                                                | 2.1                                                                 | 40                                      | 0                                       | 3.6                                       | 5.0                                                |
|     | 32    | 1000–1050                   | 42                                                       | 2.9                                                                | 2.1                                                                 | 40                                      | 0                                       | 5.0                                       | 7.2                                                |

<sup>a</sup> in unit of molecule cm<sup>-3</sup>.

**Table S10** Bimolecular rate coefficients of the reaction  $\text{CH}_2\text{OO} + \text{HCOOH}$  in six sets of experiments.

| Set               | $P_{\text{total}}$<br>/Torr | $k_1$<br>/ $10^{-10} \text{ cm}^3 \text{ molecule}^{-1} \text{ s}^{-1}$ |
|-------------------|-----------------------------|-------------------------------------------------------------------------|
| 1                 | 110                         | 1.35                                                                    |
| 2                 | 110                         | 1.38                                                                    |
| 3                 | 110                         | 1.27                                                                    |
| 4                 | 210                         | 1.50                                                                    |
| 5                 | 20                          | 1.30                                                                    |
| 6                 | 40                          | 1.50                                                                    |
| average of 6 sets |                             | $1.38 \pm 0.09$                                                         |
| all data          |                             | $1.44 \pm 0.04$                                                         |



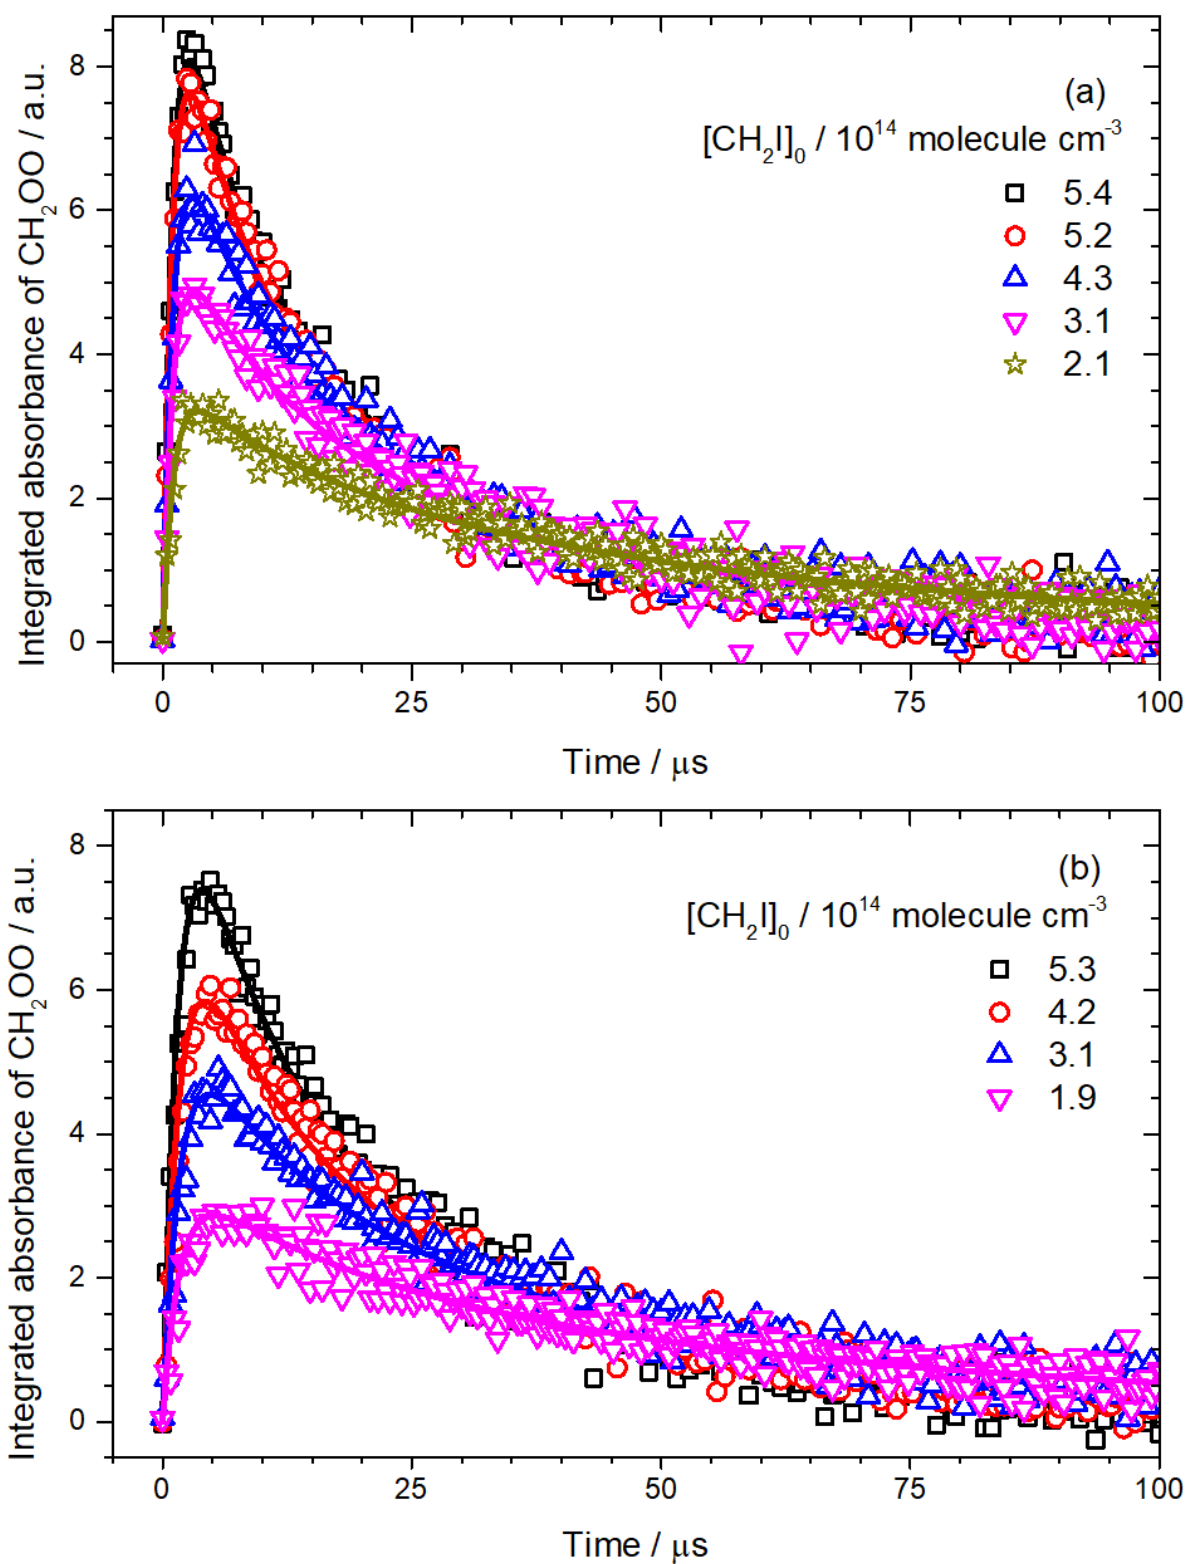

**Fig. S1** Representative temporal profiles of  $\text{CH}_2\text{OO}$  in experiments of irradiated  $\text{CH}_2\text{I}_2/\text{O}_2$  and model fitting. (a)  $\text{O}_2 = 12$  Torr and  $\text{CH}_2\text{I}_2 = 0.05\text{--}0.14$  Torr, (b).  $\text{O}_2 = 20$  Torr and  $\text{CH}_2\text{I}_2 = 0.06\text{--}0.18$  Torr. Integrated area  $905\text{--}915 \text{ cm}^{-1}$ .

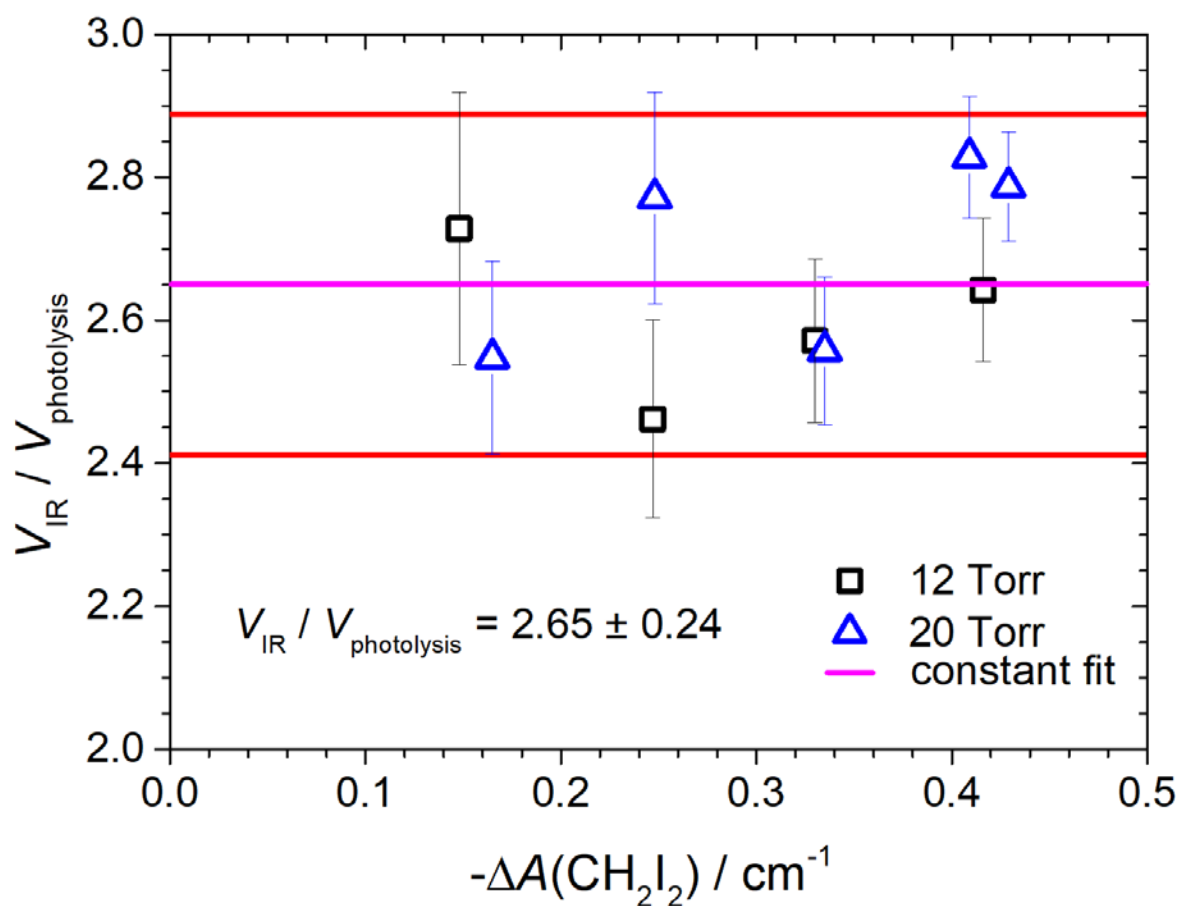

**Fig. S2** Measurements of ratios  $V_{\text{IR}}/V_{\text{photolysis}}$  at varied integrated absorbance change of  $\text{CH}_2\text{I}_2$  upon irradiation at 248 nm. Integrated spectral range is 1090–1035  $\text{cm}^{-1}$ . The red lines represent one standard deviation of the fit.

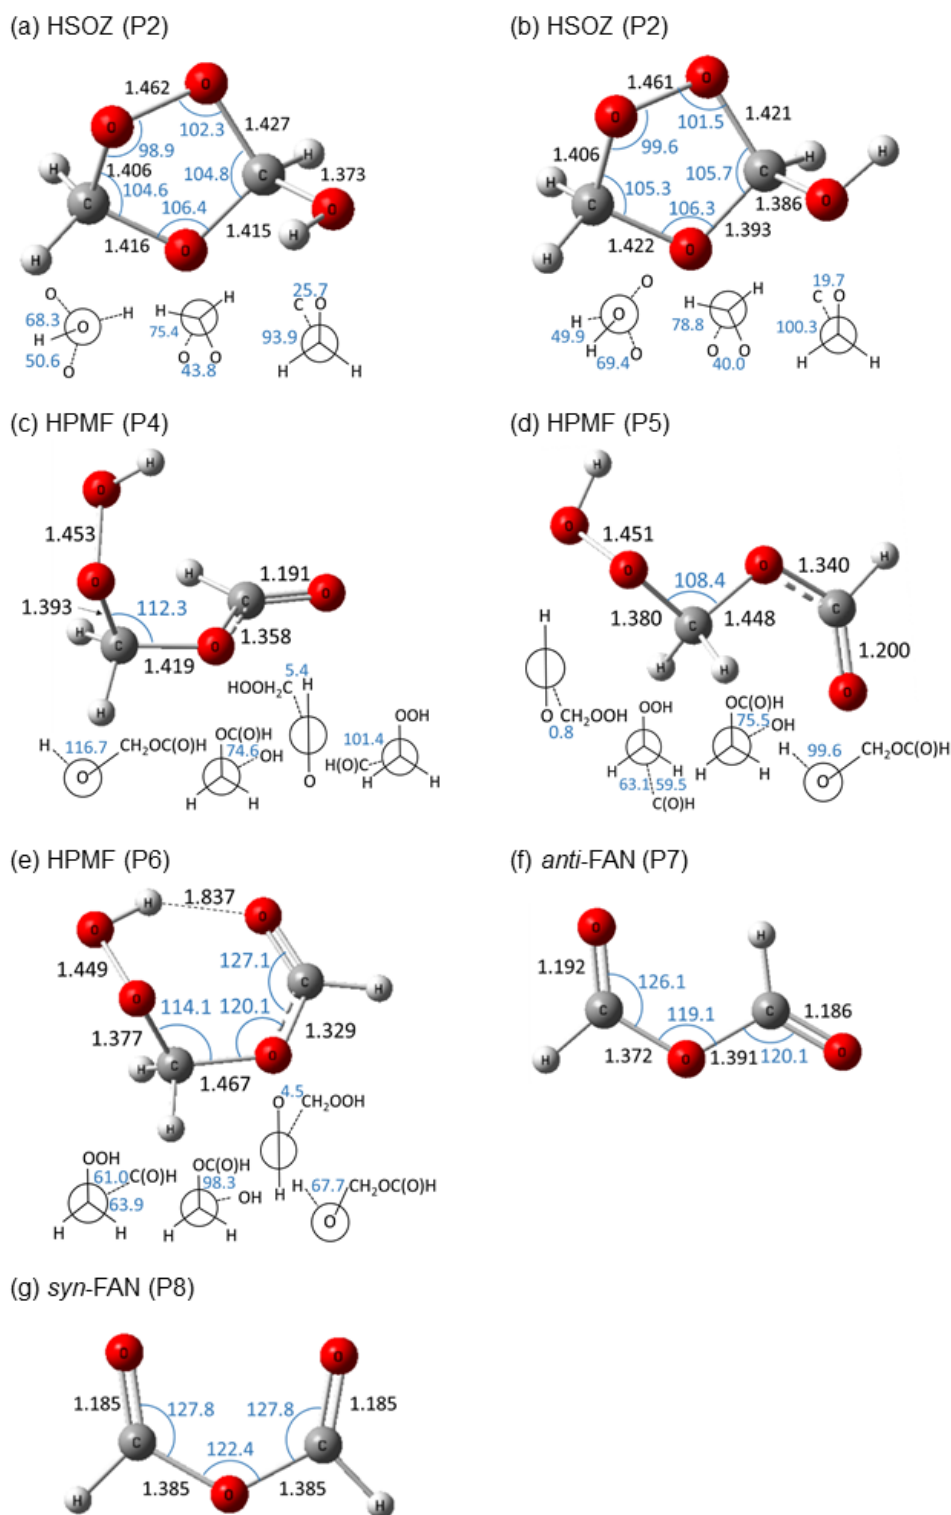

**Fig. S3** Geometries of possible intermediates in reaction  $\text{CH}_2\text{OO} + \text{HCOOH}$ . The notations of the species in Long *et al.* [*J. Mol. Struct. THEOCHEM*, 2009, **916**, 159–167] are listed in parentheses. (a) HSOZ (P1), (b) HSOZ (P2), (c) HPMF (P4), (d) HPMF (P5), (e) HPMF (P6), (f) *anti*-FAN (P7), and (g) *syn*-FAN (P8) predicted with the B3LYP/aug-cc-pVTZ method. The bond distances are given in Å and the bond angles in degree.

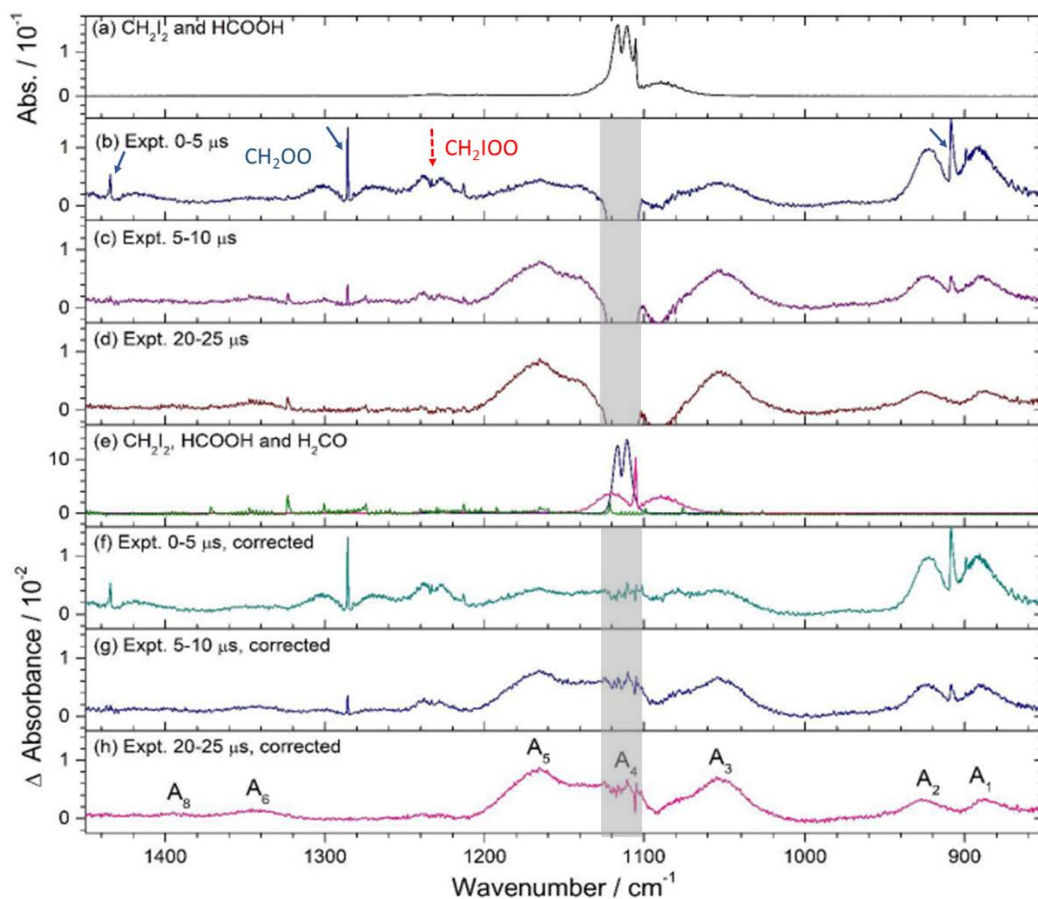

**Fig. S4** Observed spectra in region 850–1450  $\text{cm}^{-1}$  upon photolysis of a mixture of  $\text{CH}_2\text{I}_2/\text{HCOOH}/\text{N}_2/\text{O}_2$  (0.162/0.120/44.5/65.1,  $P_T = 109.9$  Torr) recorded with an external ADC. (a) Spectrum before photolysis. Difference spectra recorded 0–5  $\mu\text{s}$  (b), 5–10  $\mu\text{s}$  (c), and 20–25  $\mu\text{s}$  (d) after irradiation of the sample at 308 nm. Resolution is 0.5  $\text{cm}^{-1}$ . (e) Reference spectra of  $\text{CH}_2\text{I}_2$  (black),  $\text{HCOOH}$  (red), and  $\text{H}_2\text{CO}$  (green). Spectra with  $\text{CH}_2\text{I}_2$ ,  $\text{HCOOH}$ , and  $\text{H}_2\text{CO}$  removed are shown for 0–5  $\mu\text{s}$  (f), 5–10  $\mu\text{s}$  (g), and 20–25  $\mu\text{s}$  (h). Absorption bands of  $\text{CH}_2\text{OO}$  and  $\text{CH}_2\text{IOO}$  are indicated with blue and red arrows, respectively, in (b). The region with severe interference from  $\text{CH}_2\text{I}_2$  is indicated with grey rectangular background.

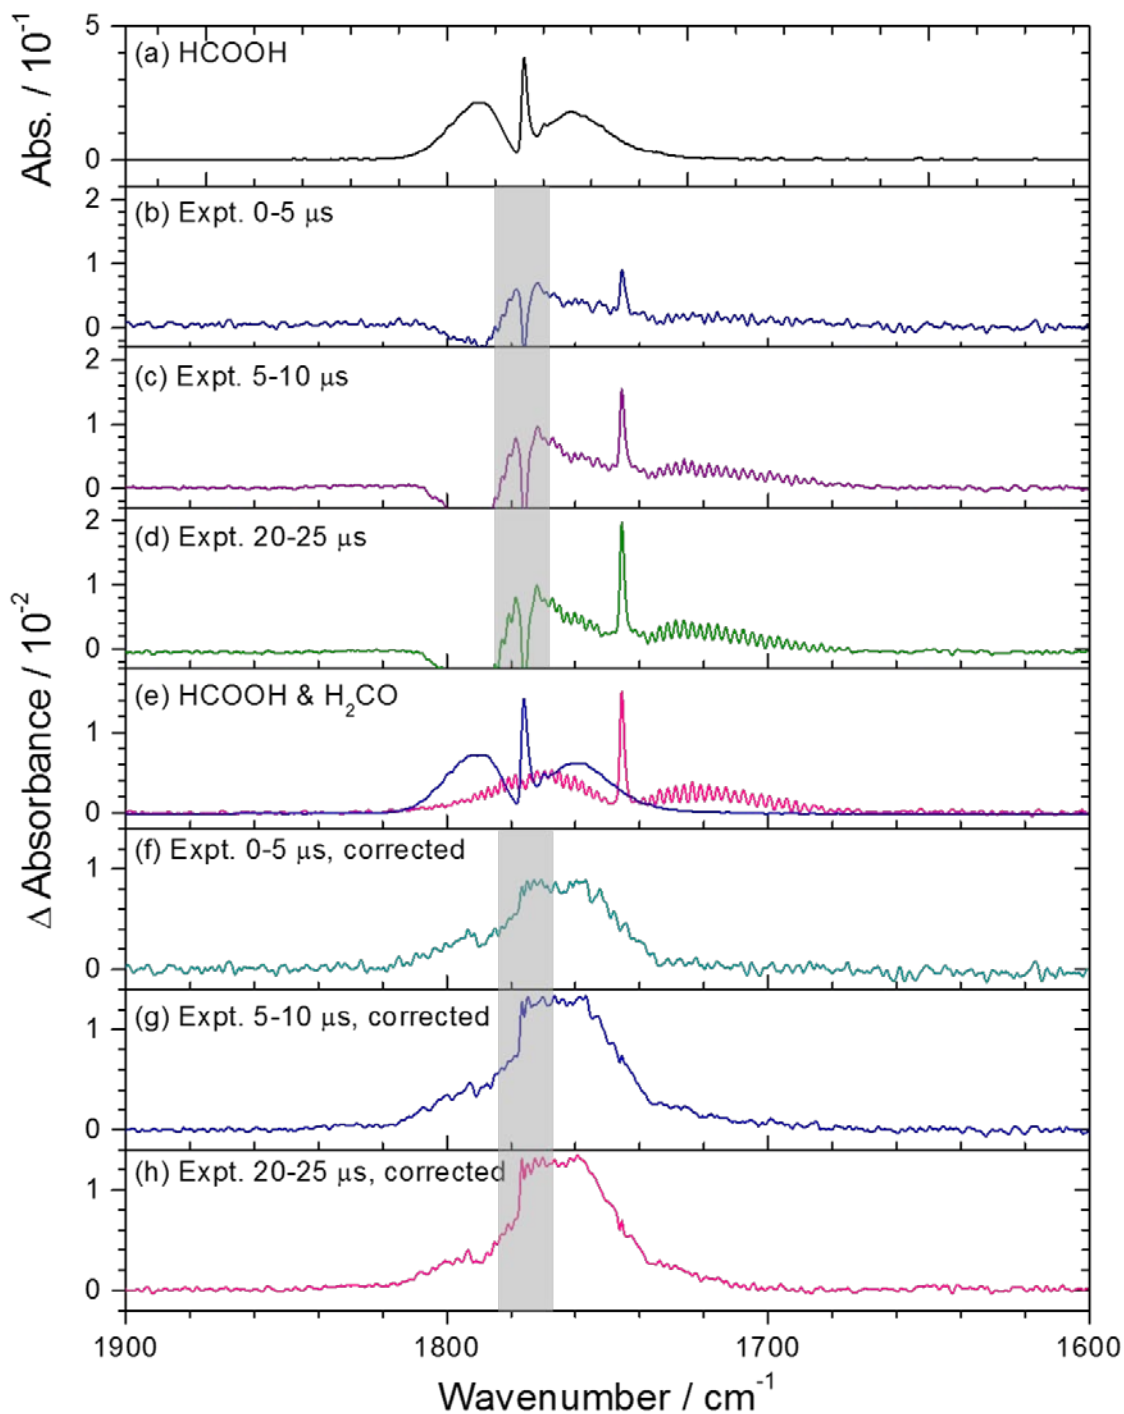

**Fig. S5** Temporal evolution of observed spectra in region 1600–1900  $\text{cm}^{-1}$  upon photolysis of a mixture of  $\text{CH}_2\text{I}_2/\text{HCOOH}/\text{N}_2/\text{O}_2$  (0.162/0.120/44.5/65.1,  $P_T = 109.9$  Torr) recorded with an external ADC. (a) Spectrum before photolysis. Difference spectra recorded 0–5  $\mu\text{s}$  (b), 5–10  $\mu\text{s}$  (c), and 20–25  $\mu\text{s}$  (d) after irradiation of the sample at 308 nm. Resolution is 1  $\text{cm}^{-1}$ . (e) Reference spectra of HCOOH (blue), and  $\text{H}_2\text{CO}$  (red). Spectra with HCOOH and  $\text{H}_2\text{CO}$  removed are shown for 0–5  $\mu\text{s}$  (f), 5–10  $\mu\text{s}$  (g), and 20–25  $\mu\text{s}$  (h). The region with severe interference from HCOOH is indicated with grey rectangular background.

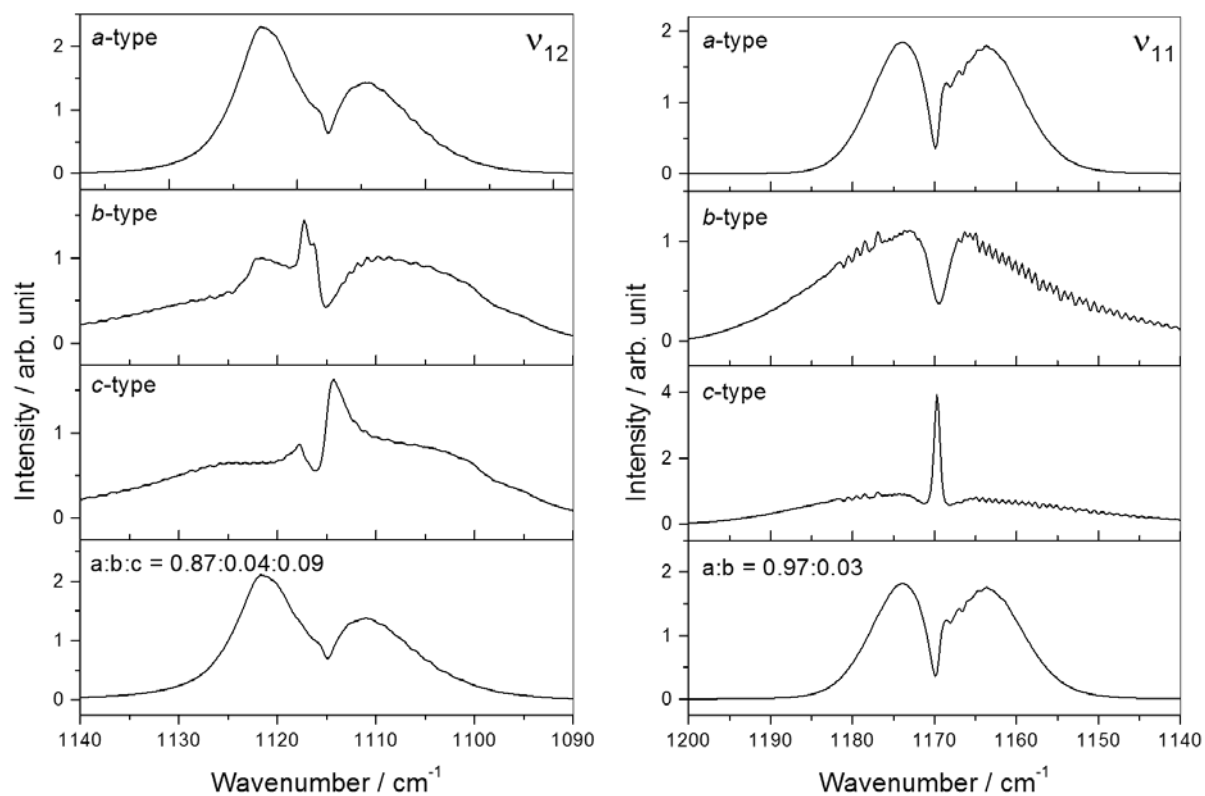

**Fig. S6** Simulated *a*-, *b*-, and *c*-type spectra and the resultant spectra for bands  $A_4$  ( $\nu_{12}$ ) and  $A_5$  ( $\nu_{11}$ ) of HPMF (P5).

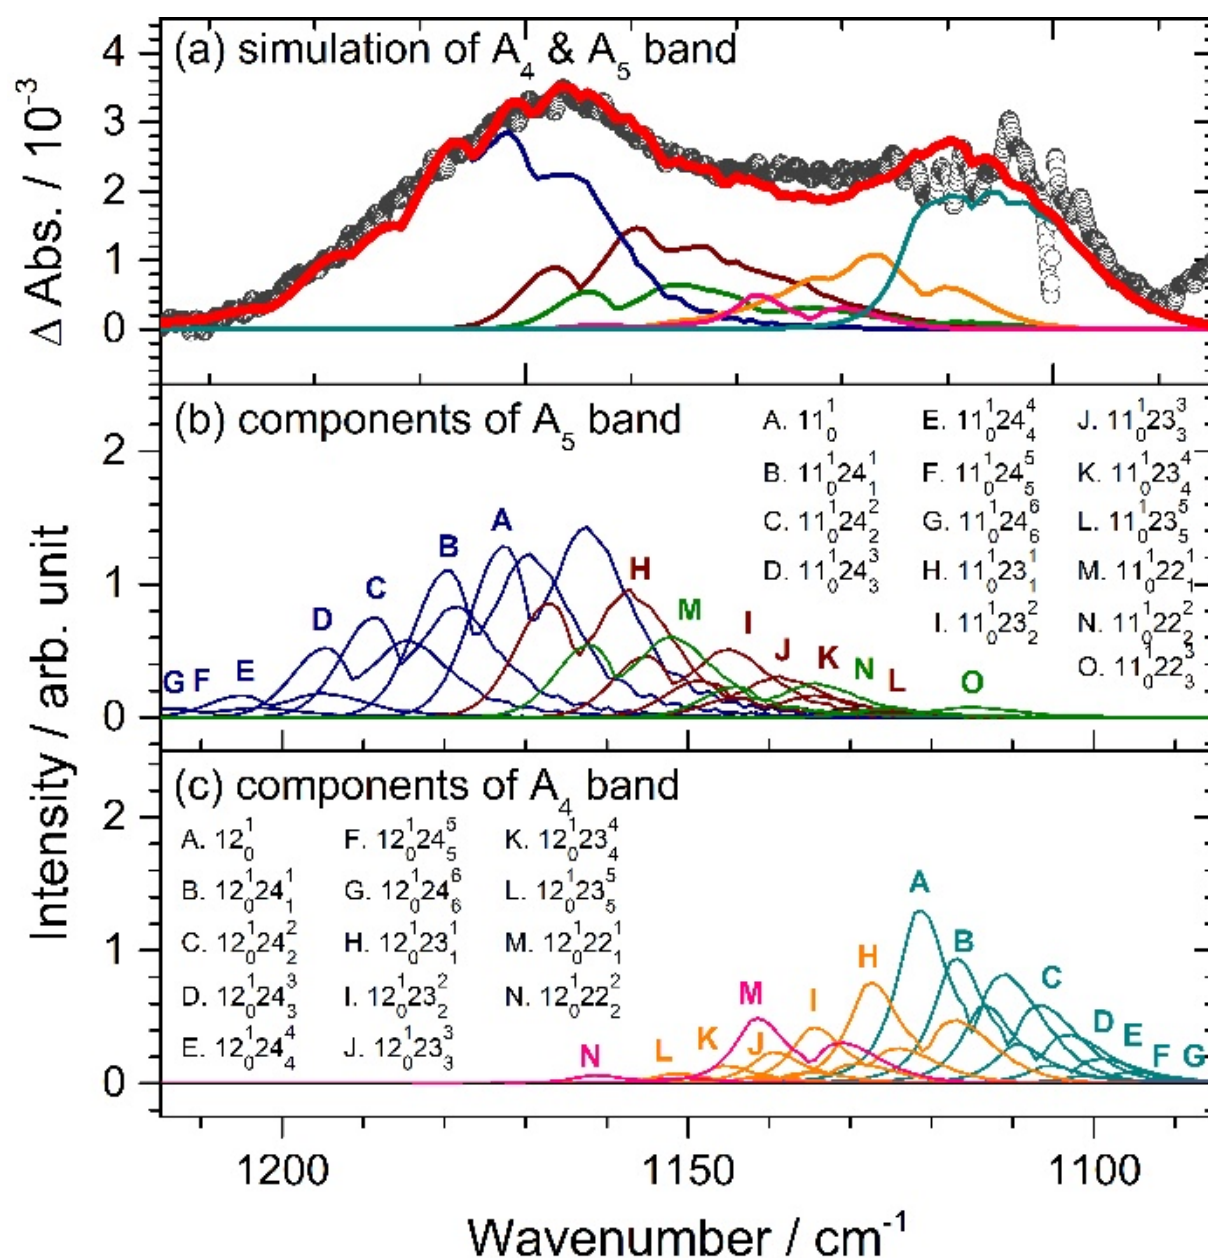

**Fig. S7** Comparison of the fitted contour with experiment for bands  $A_4$  ( $\nu_{12}$ ) and  $A_5$  ( $\nu_{11}$ ). (a) Experimental data (open circle) and simulated results (thick line: total; thin lines: fundamental and each series of hot bands). (b) The components of each individual series of hot bands for band  $A_5$ . (c) The components of each individual series of hot bands for band  $A_4$ .

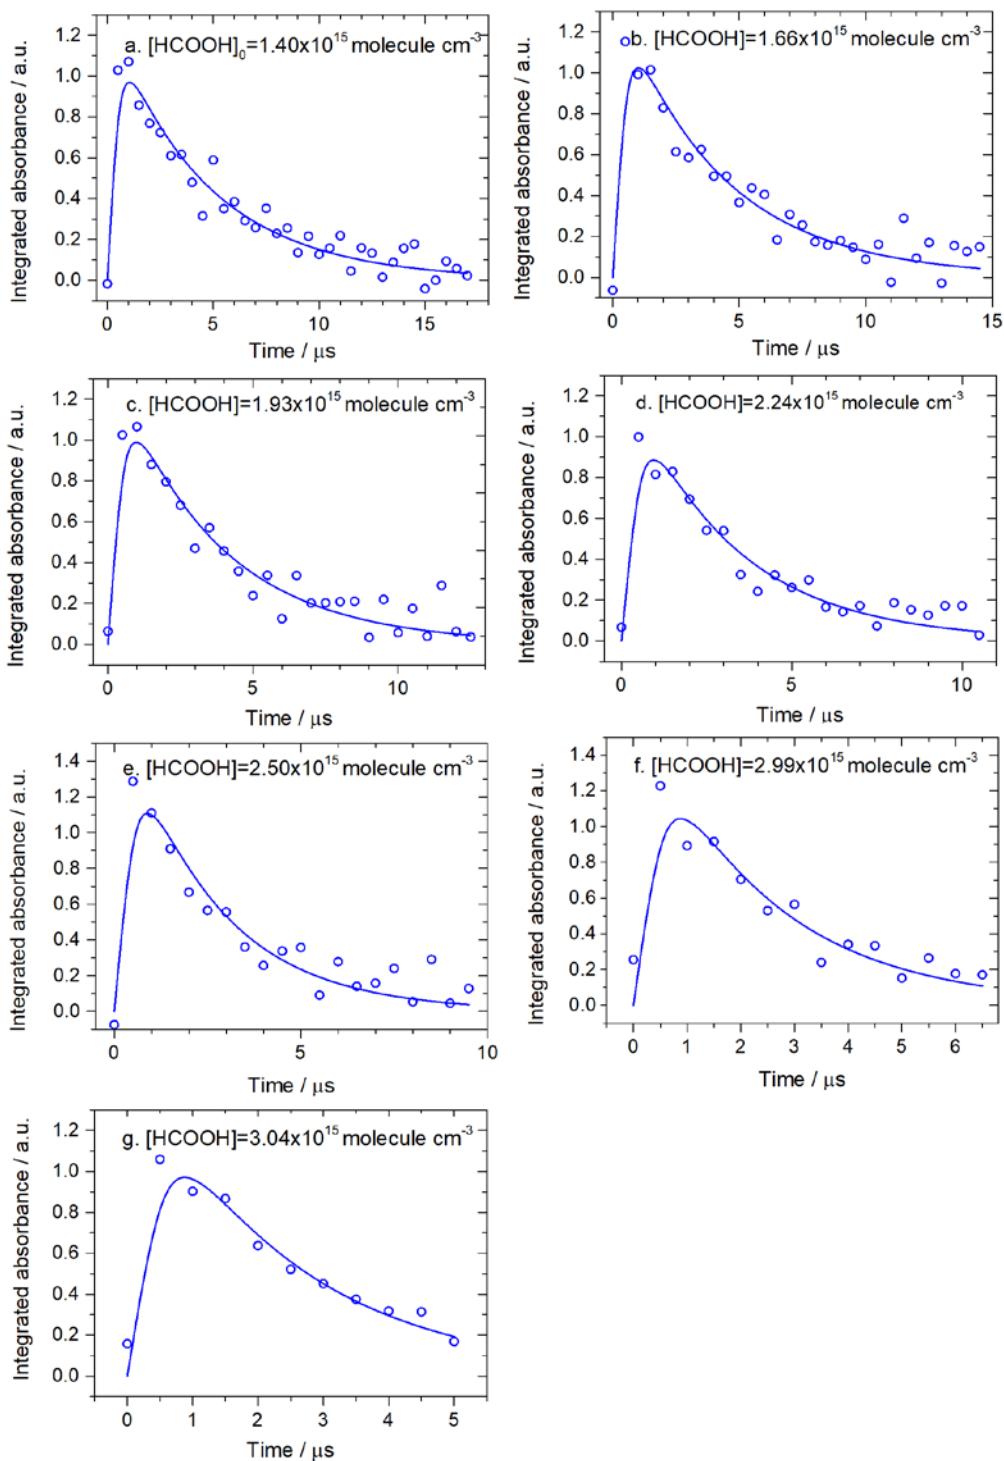

**Fig. S8** Representative experimental results and fitted temporal profiles for the decay of  $\text{CH}_2\text{OO}$  at different  $[\text{HCOOH}]_0$  for data set one.



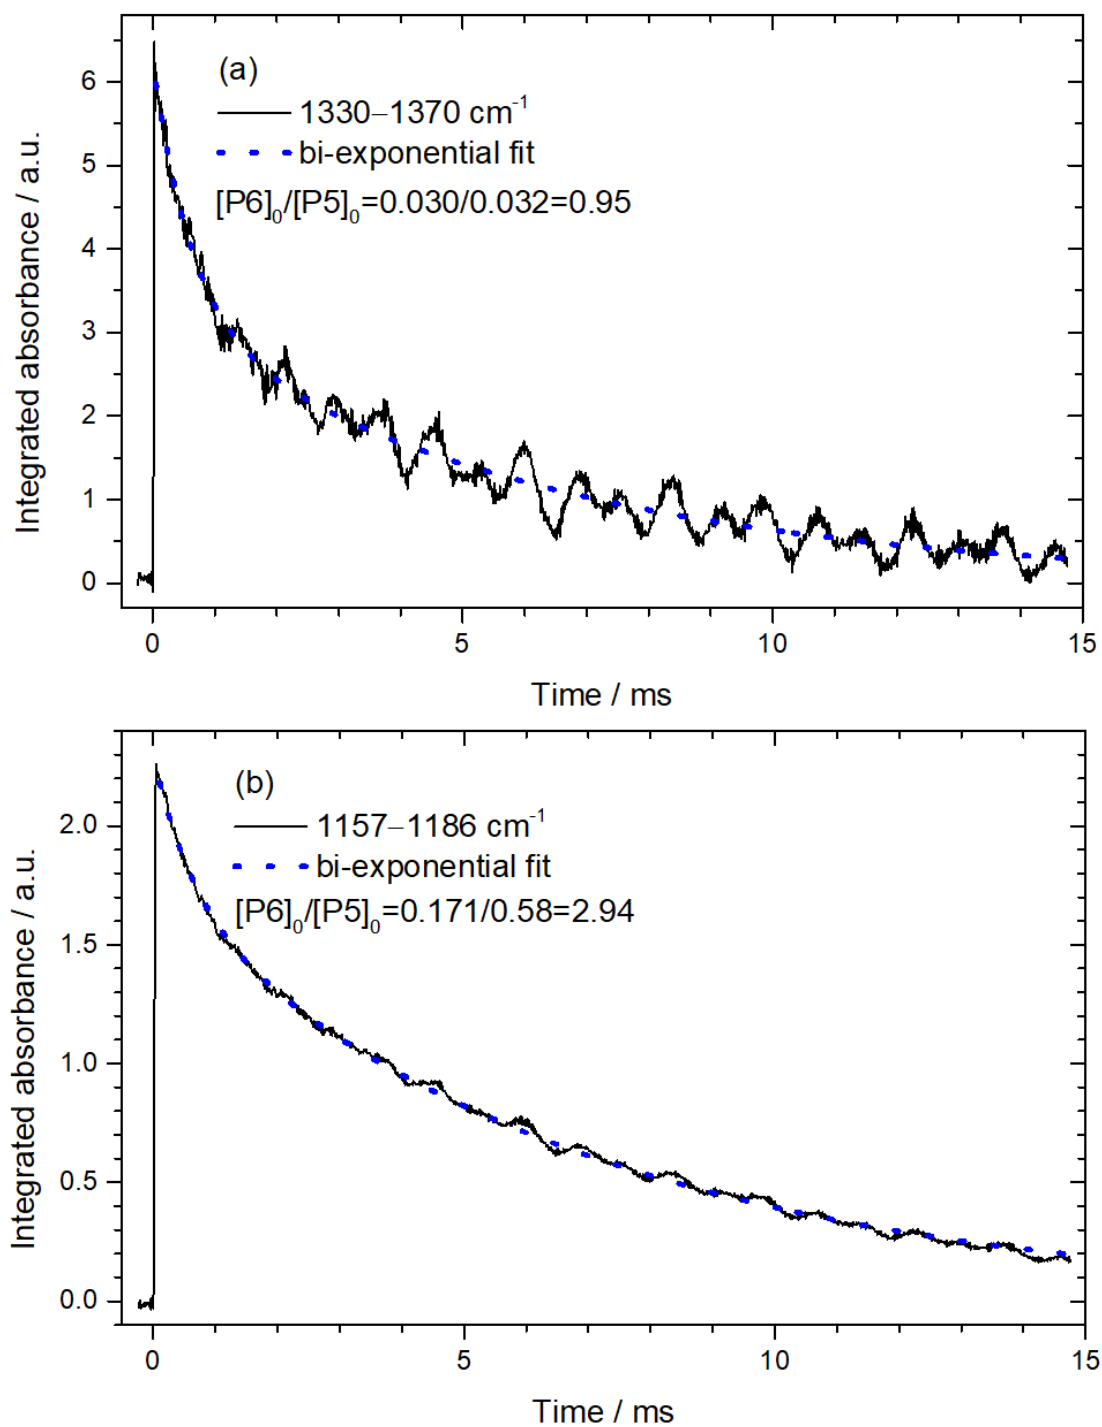

**Fig. S9** Comparison of decay profiles of HPMF obtained from integration in varied regions. (a) 1330–1370  $\text{cm}^{-1}$  (b) 1157–1186  $\text{cm}^{-1}$

## References

---

- [1] Z. J. Buras, R. M. I. Elasmra and W. H. Green, *J. Phys. Chem. Lett.*, 2014, **5**, 2224–2228
- [2] W.-L. Ting, C.-H. Chang, Y.-F. Lee, H. Matsui, Y.-P. Lee and J. J.-M. Lin, *J. Chem. Phys.*, **141**, 104308 (2014).
- [3] P.-L. Luo, Y. Endo and Y.-P. Lee, *J. Phys. Chem. Lett.*, 2018, **9**, 4391–4395.
- [4] R. Chhantyal-pun, A. Davey, D. E. Shallcross, C. J. Percival and A. J. Orr-Ewing, *Phys. Chem. Chem. Phys.*, 2015, **17**, 3617–3626.
- [5] T. J. Johnson, T. Masiello and S. W. Sharpe, *Atmos. Chem. Phys.*, 2006, **6**, 2581–2591.
- [6] C. M. Western, *PGOPHER, a Program for Simulating Rotational Structure*,  
<http://pgopher.chm.bris.ac.uk/>.
- [7] C. Mössinger, D. E. Shallcross and R. A. Cox, *J. Chem. Soc. Faraday Trans.*, 1998, **94**, 1391–1396.
- [8] A. Perrin and J. V. Auwera, *J. Quant. Spectrosc. Radiat. Trans.*, 2007, 108, 363–370.
- [9] J. V. Auwera, K. Didriche, A. Perrin and F. Keller, *J. Chem. Phys.*, 2007, **126**, 124311.
- [10] S. Enami, J. Ueda, M. Goto, Y. Nakano, S. Aloisio, S. Hashimoto and M. Kawasaki, *J. Phys. Chem. A*, 2004, 108, 6347–6350.
- [11] Y.-T. Su, H.-Y. Lin, R. Putikam, H. Matsui, M. C. Lin and Y.-P. Lee, *Nat. Chem.*, 2014, **6**, 477–483.
- [12] T. J. Gravestock, M. A. Blitz, W. J. Bloss and D. E. Heard, *ChemPhysChem*, 2010, **11**, 3928–3941.
- [13] R. Atkinson, D. L. Baulch, R. A. Cox, J. N. Crowley, R. F. Hampson, Jr., R. G. Hynes, M. E. Jenkin, M. J. Rossi and J. Troe, *Atmos. Chem. Phys.*, 2007, **7**, 981–1191.
